# Supplementary material for: Iron Deficiency Leads to Chlorosis Through Impacting Chlorophyll Synthesis and Nitrogen Metabolism in Areca catechu L
Source: Front Plant Sci. 2021 Aug 2;12:710093. doi: 10.3389/fpls.2021.710093 (PMC8365612; doi:10.3389/fpls.2021.710093)
Supplement: Supplementary file 4 [file Data_Sheet_4.XLSX]

## Sheet: Sheet1
Index	Compounds	Class	CK-1	CK-2	CK-3	EI-1	EI-2	EI-3	VIP	Fold_Change	Log2FC	Type	cpd_ID	kegg_map
pma0170	N', N''-Diferuloylspermidine	Phenolamides	81000	273000	120000	136000	9	35800	1.00131	0.362466	-1.46408	down	--	--
pma1303	LysoPC 16:2	Lipids	242000	195000	78700	64800	70900	55900	1.4975	0.371534	-1.42843	down	--	--
pma1590	Peonidin O-hexoside	Anthocyanins	829000	1100000	131000	351000	9	9	1.35918	0.170397	-2.55303	down	--	--
pma1751	Nicotinic acid-hexoside	Vitamins and derivatives	467000	672000	736000	1300000	1670000	4780000	1.56844	4.13333	2.04731	up	--	--
pma6558	Velutin	Flavone	15300	9	9	13200	15000	30100	1.41208	3.80598	1.92827	up	--	--
pma6625	E-3,4,5'-Trihydroxy-3'-glucopyranosylstilbene	Others	58800	106000	453000	338000	531000	660000	1.32214	2.47491	1.30738	up	--	--
pmb0159	DGMG (18:2) isomer2	Lipids	30700	145000	31200	8980	18600	21500	1.43484	0.237216	-2.07573	down	--	--
pmb0160	MAG (18:3) isomer5	Lipids	1390000	7480000	1870000	782000	1270000	1140000	1.31865	0.297207	-1.75046	down	--	--
pmb0163	DGMG (18:2) isomer3	Lipids	19300	139000	33900	24000	17500	9420	1.24077	0.264932	-1.9163	down	--	--
pmb0197	N2-methylguanosine	Nucleotide and derivates	27400	22100	14600	9	9	17700	1.39478	0.276412	-1.85511	down	--	--
pmb0296	MAG (18:1) isomer2	Lipids	299000	2150000	434000	95900	231000	453000	1.19497	0.270517	-1.88621	down	--	--
pmb0325	N-Feruloyl spermidine	Phenolamides	180000	9	184000	323000	311000	225000	1.00104	2.35983	1.23868	up	--	--
pmb0557	Cyanidin O-malonyl-malonylhexoside	Anthocyanins	46200	84600	151000	200000	197000	462000	1.48762	3.04826	1.60799	up	--	--
pmb0639	8-C-hexosyl-apigenin O-hexosyl-O-hexoside	Flavone	7100000	9880000	2250000	3120000	1740000	1830000	1.32636	0.347894	-1.52328	down	--	--
pmb0661	Chrysoeriol C-hexosyl-O-rhamnoside	Flavone	1080000	1200000	312000	402000	406000	469000	1.04192	0.49267	-1.02131	down	--	--
pmb0665	Luteolin 8-C-hexosyl-O-hexoside	Flavone	2770000	2430000	741000	869000	790000	903000	1.22016	0.431241	-1.21344	down	--	--
pmb0677	C-hexosyl-chrysoeriol O-sinapoylhexoside	Flavone	178000	73400	55400	27400	36000	82800	1.14191	0.476532	-1.06936	down	--	--
pmb0711	Quercetin 7-O-rutinoside	Flavonol	1420000	1240000	448000	429000	536000	463000	1.2833	0.459459	-1.12199	down	--	--
pmb0713	Tricin 7-O-hexosyl-O-hexoside	Flavone	46500	9	54300	77800	53000	156000	1.0264	2.84498	1.50842	up	--	--
pmb0751	5-O-p-Coumaroyl shikimic acid	Organic acids and derivatives	53500	31900	40600	9	9	9	1.91258	0.000214286	-12.1882	down	--	--
pmb0774	N-hydroxy tryptamine	Alkaloids	9	9	1050000	654000	798000	865000	1.33048	2.20663	1.14184	up	C17203	ko00380
pmb0789	Pyridoxine O-glucoside	Vitamins and derivatives	12800000	13600000	6850000	9270000	4480000	1680000	1.24162	0.46406	-1.10762	down	--	--
pmb0865	LysoPC 18:3 (2n isomer)	Lipids	1930000	4920000	1720000	1510000	892000	681000	1.48242	0.359743	-1.47496	down	--	--
pmb0896	N'-Feruloyl putrescine	Phenolamides	12800000	48200000	15300000	11000000	16300000	8510000	1.10624	0.469332	-1.09132	down	--	--
pmb0907	N-Feruloyl putrescine	Phenolamides	461000	1670000	468000	378000	539000	305000	1.07793	0.470181	-1.08871	down	C10497	ko00330
pmb1178	O-Feruloyl 2-hydroxylcoumarin	Phenylpropanoids	633000	334000	539000	1020000	1540000	523000	1.31957	2.04714	1.03361	up	--	--
pmb1605	MAG (18:3) isomer3	Lipids	2800000	14800000	3660000	1890000	2480000	2230000	1.29701	0.310442	-1.6876	down	--	--
pmb1626	MGMG (18:2) isomer1	Lipids	20800	136000	61200	23700	30600	22100	1.17084	0.350459	-1.51268	down	--	--
pmb1656	MAG (18:3) isomer4	Lipids	143000	212000	141000	86900	67400	70200	1.79669	0.452621	-1.14362	down	--	--
pmb2325	MAG (18:3) isomer2	Lipids	4200000	21200000	5430000	3080000	4180000	3610000	1.2194	0.352579	-1.50398	down	--	--
pmb2363	MAG (18:1) isomer1	Lipids	269000	2080000	392000	136000	244000	444000	1.08475	0.30062	-1.73399	down	--	--
pmb2586	Gallocatechin-catechin	Polyphenol	2240000	3590000	987000	1110000	820000	1390000	1.18055	0.487018	-1.03795	down	--	--
pmb2786	9-HOTrE	Lipids	67100	42900	41900	39900	9	9	1.35936	0.262791	-1.92801	down	--	--
pmb2871	2,5-dihydroxy benzoic acid O-hexside	Organic acids and derivatives	1990000	3120000	21800000	15800000	14900000	25700000	1.22164	2.09588	1.06755	up	--	--
pmb2893	N-p-Coumaroyl hydroxyagmatine	Phenolamides	16900	12300	16900	9	8000	9630	1.02806	0.382625	-1.386	down	--	--
pmb2928	Gallic acid O-Hexoside	Organic acids and derivatives	1520000	910000	5010000	5380000	4180000	8710000	1.37424	2.45565	1.2961	up	--	--
pmb2954	Luteolin O-hexosyl-O-hexosyl-O-hexoside	Flavone	630000	285000	158000	179000	134000	164000	1.17267	0.444548	-1.16959	down	--	--
pmb2981	Apigenin C-hexosyl-O-rutinoside	Flavone	613000	647000	307000	254000	230000	58500	1.41411	0.346203	-1.53031	down	--	--
pmb3002	Chrysoeriol 7-O-rutinoside	Flavone	29600000	27500000	8910000	9490000	10600000	12700000	1.13499	0.496743	-1.00943	down	--	--
pmb3023	Eriodictyol C-hexoside	Flavone	2730000	1360000	2130000	4130000	2910000	6260000	1.51439	2.13826	1.09644	up	--	--
pmb3055	p-Coumaroyl quinic acid O-glucuronic acid	Organic acids and derivatives	40700	25300	51900	98900	115000	266000	1.67637	4.0704	2.02517	up	--	--
pmb3059	Quinic acid O-di-glucuronic acid	Organic acids and derivatives	15900	21900	62400	67600	59400	99700	1.4053	2.26248	1.1779	up	--	--
pmb3061	5-O-p-coumaroyl quinic acid O-hexoside	Organic acids and derivatives	39700	17900	29200	60700	89500	82000	1.73242	2.67512	1.4196	up	--	--
pmb3064	3-O-p-coumaroyl quinic acid O-hexoside	Organic acids and derivatives	26100	9	22400	60800	71700	83600	1.15634	4.45484	2.15537	up	--	--
pmb3066	5-O-p-coumaroyl shikimic acid O-hexoside	Organic acids and derivatives	56800	108000	37900	39000	9	9	1.38946	0.192491	-2.37713	down	--	--
pmd0136	LysoPC 18:0	Lipids	17900000	20700000	11100000	7860000	7350000	6050000	1.71956	0.427767	-1.2251	down	--	--
pme0008	L-Citrulline	Amino acid and derivatives	13000000	14100000	8410000	5090000	4460000	3970000	1.79686	0.380738	-1.39313	down	C00327	ko00220,ko01100,ko01110,ko01130,ko01230
pme0037	L-Histidine	Amino acid and derivatives	1410000	2800000	980000	260000	271000	558000	1.72959	0.209827	-2.25273	down	C00135	ko00340,ko00410,ko00970,ko01060,ko01065,ko01100,ko01110,ko01230,ko02010,ko04974,ko05230
pme0075	N-Acetyl-L-glutamic acid	Amino acid and derivatives	860000	2810000	639000	641000	616000	565000	1.15404	0.422836	-1.24183	down	C00624	ko00220,ko01100,ko01110,ko01130,ko01210,ko01230
pme0108	5-Methylcytosine	Nucleotide and derivates	300000	352000	139000	62800	76200	35700	1.71688	0.22086	-2.1788	down	C02376	ko00240
pme0124	Glycyl-L-proline	Amino acid and derivatives	33300	30900	23600	15200	11000	9500	1.77915	0.406606	-1.2983	down	--	--
pme0138	Nα-Acetyl-L-glutamine	Amino acid and derivatives	23800000	24300000	17600000	6340000	4510000	7000000	1.85957	0.271689	-1.87997	down	--	--
pme0164	N-γ-Acetyl-N-2-Formyl-5-methoxykynurenamine	Amino acid and derivatives	19200	11000	28200	26300	38100	54900	1.41144	2.04281	1.03055	up	C05642	ko00380
pme0226	L-Asparagine	Amino acid and derivatives	513000	780000	337000	207000	221000	280000	1.62647	0.434356	-1.20305	down	C00152	ko00250,ko00460,ko00970,ko01060,ko01100,ko01110,ko01230,ko04974,ko04978,ko05230
pme0264	Thymidine	Nucleotide and derivates	183000	135000	69000	9	9	9	1.9118	6.97674e-05	-13.8071	down	C00214	ko00240,ko01100
pme0267	2-Methylsuccinic acid	Organic acids and derivatives	6350000	3380000	6180000	7600000	14600000	31500000	1.46487	3.37524	1.75499	up	--	--
pme0270	Maleic acid	Organic acids and derivatives	370000	418000	295000	168000	145000	153000	1.85766	0.430286	-1.21663	down	C01384	ko00350,ko00650,ko00760,ko01120
pme0284	4-Guanidinobutyric acid	Organic acids and derivatives	78500	215000	56900	68400	42300	33800	1.26249	0.412386	-1.27793	down	C01035	ko00330,ko01100
pme0321	Kaempferol 7-O-rhamnoside	Flavonol	185000	186000	9	9	9	9	1.35924	7.27745e-05	-13.7462	down	--	--
pme0388	Homovanillic acid	Phenylpropanoids	9	9	278000	383000	398000	976000	1.41374	6.31973	2.65986	up	C05582	ko00350,ko01100,ko04728
pme0428	3,4,5-Trimethoxycinnamic acid	Phenylpropanoids	9	9	9	14100	13000	26800	1.91092	1996.3	10.9631	up	--	--
pme0534	Gluconic acid	Others	1210000	850000	1480000	1540000	1740000	6880000	1.204	2.87006	1.52108	up	C00257	ko00030,ko01100,ko01110,ko01120,ko01130,ko01200
pme1011	Benzamidine	Others	2330000	1390000	1890000	3960000	3010000	4270000	1.7229	2.00357	1.00257	up	C01784	--
pme1070	L-(-)-Tyrosine	Amino acid and derivatives	1420000	1210000	892000	351000	243000	254000	1.85109	0.240772	-2.05426	down	C00082	ko00130,ko00231,ko00261,ko00350,ko00360,ko00400,ko00401,ko00460,ko00680,ko00730,ko00940,ko00950,ko00965,ko00966,ko00970,ko01055,ko01059,ko01060,ko01063,ko01100,ko01110,ko01130,ko01210,ko01230,ko04728,ko04916,ko04917,ko04974,ko05012,ko05030,ko05031,ko05034,ko05230
pme1201	Phloretin	Flavanone	21500	23900	16200	9	9	9	1.91615	0.000438312	-11.1558	down	C00774	ko00941,ko01110
pme1283	S-(5'-Adenosy)-L-homocysteine	Amino acid and derivatives	265000	233000	292000	407000	537000	794000	1.67641	2.2	1.1375	up	C00021	ko00270,ko01100,ko01230
pme1376	2'-Deoxycytidine-5'-monophosphate	Nucleotide and derivates	153000	247000	87200	82900	46000	49700	1.5511	0.366585	-1.44778	down	C00239	ko00240,ko01100
pme1383	Pyridoxine	Vitamins and derivatives	7220000	12500000	4840000	5440000	3800000	1870000	1.33665	0.452362	-1.14445	down	C00314	ko00750,ko01100,ko01120
pme1399	Xanthohumol	Flavanone	24000	135000	30700	16200	27400	17700	1.20227	0.323142	-1.62976	down	C16417	ko00941
pme1539	Isorhamnetin 3-O-neohesperidoside	Flavonol	4910000	4320000	4820000	5940000	6310000	16200000	1.26995	2.02491	1.01786	up	--	--
pme1683	D-Pantothenic dcid	Organic acids and derivatives	19300	9	19600	23700	20400	60300	1.01853	2.68318	1.42395	up	C12276	--
pme1715	L-Saccharopine	Amino acid and derivatives	1100000	767000	383000	511000	331000	258000	1.26239	0.488889	-1.03242	down	C00449	ko00300,ko00310,ko01100,ko01110,ko01130,ko01230
pme1806	Chlorogenic acid methyl ester	Organic acids and derivatives	124000	61100	209000	265000	299000	305000	1.5291	2.20502	1.14079	up	--	--
pme1828	Betaine	Alkaloids	100000	29000	96300	40500	9	24900	1.01117	0.29032	-1.78429	down	C00719	ko00260,ko01100,ko02010
pme1841	1,5-Diaminopentane	Phenolamides	60900	41700	24700	24700	17700	17700	1.46514	0.472113	-1.0828	down	C01672	ko00310,ko00480,ko00960,ko01060,ko01064,ko01100,ko01110,ko04974
pme1936	Creatinine	Organic acids and derivatives	1410000	1690000	910000	814000	432000	647000	1.58205	0.47207	-1.08293	down	C00791	ko00330,ko01100
pme1966	2-Aminoethanesulfonic acid	Organic acids and derivatives	13600	702000	27900	9	14300	9	1.47332	0.0192576	-5.69843	down	C00245	ko00120,ko00430,ko00920,ko01100,ko02010,ko04080
pme2142	L-Theanine	Amino acid and derivatives	1320000	1470000	1660000	423000	496000	431000	1.90074	0.303371	-1.72085	down	C01047	--
pme2237	Dulcitol	Alcohols	9	12500	9	8730	13300	15400	1.30223	2.99009	1.58019	up	C01697	ko00052,ko01100,ko02060
pme2277	3-Aminosalicylic acid	Organic acids and derivatives	241000	207000	209000	126000	136000	61700	1.56701	0.492694	-1.02124	down	--	--
pme2319	Hesperetin	Flavanone	11700	6190	19100	20800	12100	87200	1.07983	3.24682	1.69903	up	C01709	ko00941
pme2366	Phenethylamine	Others	219000	9	160000	146000	357000	561000	1.00288	2.80732	1.48919	up	C05332	ko00360
pme2433	Diethanolamine	Others	3150	12000	12000	9	9	9	1.90739	0.000994475	-9.97378	down	C06772	ko00564
pme2529	1,5-Anhydro-D-glucitol	Alcohols	9	9	9	9	12100	11800	1.33703	885.519	9.79038	up	C07326	--
pme2569	(5-L-Glutamyl)-L-amino acid	Amino acid and derivatives	833000	898000	403000	328000	326000	292000	1.58612	0.443299	-1.17365	down	C03740	ko00480,ko01100
pme2639	Enterodiol	Alcohols	144000	142000	164000	55900	9	9	1.43952	0.124262	-3.00854	down	C18166	--
pme2773	L-Cystathionine	Amino acid and derivatives	142000	95800	123000	62400	49000	37300	1.73998	0.41214	-1.27879	down	C02291	ko00260,ko00270,ko01100,ko01110,ko01130,ko01230
pme2890	L-Homocystine	Amino acid and derivatives	171000	125000	96200	93400	71400	29000	1.32911	0.494136	-1.01702	down	C01817	ko00270
pme2895	Dihydromyricetin	Flavonol	40800	30600	29000	13900	9	21800	1.02164	0.355667	-1.4914	down	C02906	ko00941,ko01110
pme3007	Uridine 5’-diphosphate	Nucleotide and derivates	43300	47800	75600	103000	131000	138000	1.72656	2.23155	1.15805	up	C00015	ko00240,ko00908,ko01100,ko04080
pme3038	5-oxoproline	Amino acid and derivatives	471000	365000	141000	9	9	9	1.91091	2.76356e-05	-15.1431	down	C01879	ko00480,ko01100
pme3146	Ureidoisobutyric acid	Organic acids and derivatives	83800	87900	81900	21100	29000	33800	1.86854	0.330836	-1.59581	down	--	--
pme3163	D-Sedoheptuiose 7-phosphate	Carbohydrates	469000	126000	390000	1430000	829000	1040000	1.63427	3.34924	1.74383	up	--	--
pme3184	2'-Deoxyadenosine-5'-monophosphate	Nucleotide and derivates	680000	1030000	578000	514000	366000	139000	1.39199	0.445367	-1.16693	down	C00360	ko00230,ko01100
pme3188	Uridine 5'-monophosphate	Nucleotide and derivates	49300	42700	64400	73800	200000	135000	1.56798	2.61381	1.38615	up	C00105	ko00240,ko01100
pme3300	Tricetin	Flavone	49000	51200	200000	318000	155000	143000	1.24169	2.05197	1.03701	up	C10192	ko00941
pme3349	8-Hydroxy-2-deoxyguanosine	Nucleotide and derivates	22900	19500	33100	49600	54400	121000	1.61501	2.98013	1.57538	up	--	--
pme3388	H-HomoArg-OH	Amino acid and derivatives	9460000	7120000	3260000	2780000	2100000	2710000	1.52293	0.38256	-1.38624	down	C01924	--
pme3967	2-(dimethylamino)guanosine	Nucleotide and derivates	2070000	915000	1390000	527000	649000	382000	1.63435	0.356114	-1.48959	down	--	--
pme3970	β-Pseudouridine	Nucleotide and derivates	205000	238000	132000	113000	48800	56300	1.62512	0.379304	-1.39857	down	C02067	ko00240
pmf0018	1-Aminocyclopropanecarboxylic acid	Amino acid and derivatives	358000	313000	213000	209000	117000	51600	1.4101	0.427149	-1.22719	down	--	--
pmf0096	Oxalic acid	Organic acids and derivatives	29100	9	31000	105000	96000	63700	1.14656	4.40367	2.13871	up	C00209	ko00230,ko00625,ko00630,ko01100,ko01120
pmf0139	D-(+)-Galactose	Carbohydrates	171000	184000	133000	99900	50400	9	1.00095	0.30801	-1.69895	down	C00124	ko00052,ko01100,ko02030,ko02060,ko04973,ko04978
pmf0166	Schizandrin	Phenylpropanoids	2400000	2580000	1220000	9	1340000	9	1.38139	0.216132	-2.21002	down	C17064	--
pmf0196	Phosphoenolpyruvic acid	Organic acids and derivatives	422000	484000	695000	1800000	1980000	1990000	1.8618	3.604	1.8496	up	--	--
pmf0204	Hyperoside	Flavonoid	9	9	1950000	1210000	1430000	3190000	1.34748	2.98972	1.58001	up	--	--
pmf0208	Isoquercitroside	Flavonoid	9	9	1890000	1200000	1550000	3070000	1.35134	3.07934	1.62262	up	--	--
pmf0275	Herbacetin	Flavonoid	91900	105000	141000	9	9	9	1.91601	7.99053e-05	-13.6113	down	--	--
pmf0353	1,18-Octadecanediol	Lipids	142000	88900	123000	9	172000	9	1.30496	0.486064	-1.04078	down	--	--
pmf0434	Loganin	Terpene	339000	158000	294000	587000	442000	770000	1.61627	2.27434	1.18545	up	C01433	ko00902,ko01062,ko01100,ko01110
pmf0469	cis-4-Hydroxy-D-proline	Amino acid and derivatives	6000	9	9420	6910	8610	27900	1.02034	2.81418	1.49272	up	C03440	ko00330
pmf0494	2-Picolylamine	Alkaloids	336000	126000	354000	485000	708000	643000	1.53597	2.25	1.16993	up	C17926	--
pmf0519	Bergenin	Others	20000	31600	24100	60100	62700	65300	1.81884	2.48481	1.31313	up	C09919	--
pmf0532	Phillyroside	Phenylpropanoids	36600	9	9	48500	31900	50000	1.41258	3.56109	1.83232	up	C17048	--
pmf0549	Diosmin	Flavonoid	32100000	31000000	9800000	10600000	11700000	13200000	1.16033	0.486968	-1.0381	down	C10039	--
pmf0555	Parietin	Quinones	32600	17300	37400	39600	9	9	1.28453	0.453814	-1.13983	down	--	--
