# Supplementary material for: Iron Deficiency Leads to Chlorosis Through Impacting Chlorophyll Synthesis and Nitrogen Metabolism in Areca catechu L
Source: Front Plant Sci. 2021 Aug 2;12:710093. doi: 10.3389/fpls.2021.710093 (PMC8365612; doi:10.3389/fpls.2021.710093)
Supplement: Supplementary file 5 [file Data_Sheet_5.XLSX]

## Sheet: Sheet1
Index	Compounds	Class	CK-1	CK-2	CK-3	ID-1	ID-2	ID-3	VIP	Fold_Change	Log2FC	Type	cpd_ID	kegg_map
pmf0594	D-(+)-Phenylalanine	Amino acid and derivatives	1460000	1340000	1670000	4460000	3610000	3640000	1.85768	2.61969	1.38939	up	C02265	ko00360,ko04742
pmf0572	Paeonol	Phenylpropanoids	9	9	9	77900	106000	87000	1.89426	10033.3	13.2925	up	C10712	--
pmf0555	Parietin	Quinones	32600	17300	37400	9	24300	9	1.30131	0.278557	-1.84396	down	--	--
pmf0551	Tectochrysin	Flavonoid	24400	26000	24400	72900	50100	39400	1.75546	2.17112	1.11844	up	C11621	--
pmf0526	Isoimperatorin	Phenylpropanoids	44600	35600	24200	9	35500	9	1.27243	0.340211	-1.5555	down	C16976	--
pmf0433	Swertiamarin	Terpene	344000	341000	295000	1870000	406000	516000	1.26904	2.84898	1.51045	up	C09800	--
pmf0360	Astilbin	Flavonoid	1750000	1400000	1980000	11000000	5230000	2510000	1.56194	3.65302	1.86909	up	C17449	--
pmf0232	Tiliroside	Flavonoid	336000	9	9	180000	833000	108000	1.34614	3.33613	1.73818	up	C17140	--
pmf0179	Narcissoside	Flavonoid	16100000	16400000	17600000	68900000	17400000	26000000	1.17836	2.24152	1.16448	up	--	--
pmf0176	Piceatannol	Phenylpropanoids	12500	9	9	127000	17600	121000	1.51306	21.2174	4.40718	up	C05901	ko00945,ko01110
pmf0129	Benzyl salicylate	Organic acids and derivatives	53900	35200	112000	9	55400	9	1.29479	0.275574	-1.85949	down	--	--
pmf0058	4',5,7-Trihydroxyflavanone	Flavanone	51300	43300	29700	242000	71500	78600	1.50569	3.15447	1.6574	up	C00509	ko00941,ko00943,ko01061,ko01100,ko01110
pmf0057	4,2',4',6'-Tetrahydroxychalcone	Flavone	16500	9	9	41500	19600	19300	1.4234	4.86742	2.28316	up	C06561	ko00941,ko01061,ko01100,ko01110
pme3970	β-Pseudouridine	Nucleotide and derivates	205000	238000	132000	1240000	1060000	749000	1.86615	5.30261	2.4067	up	C02067	ko00240
pme3967	2-(dimethylamino)guanosine	Nucleotide and derivates	2070000	915000	1390000	5900000	3870000	3780000	1.72779	3.09714	1.63094	up	--	--
pme3838	Guanosine 3',5'-cyclic monophosphate	Nucleotide and derivates	96100	75800	96600	118000	296000	180000	1.50762	2.21229	1.14554	up	C00942	ko00230,ko04022,ko04270,ko04540,ko04611,ko04713,ko04714,ko04730,ko04740,ko04744,ko04921,ko04923,ko04924,ko04925,ko04970,ko04976
pme3827	3,4-Dihydroxy-DL-phenylalanine	Amino acid and derivatives	597000	873000	574000	9	9	948000	1.4127	0.463805	-1.10841	down	C00355	ko00350,ko00950,ko00965,ko01060,ko01063,ko01100,ko01110,ko04728,ko04917,ko05012,ko05030,ko05031,ko05034
pme3475	Butin	Flavone	79400	68700	9	544000	270000	182000	1.19295	6.72478	2.74949	up	C09614	ko00941
pme3461	Homoeriodictyol	Flavanone	24000	20500	30400	102000	32500	68600	1.45927	2.71162	1.43915	up	C09756	ko00941
pme3407	Laricitrin	Flavonol	406000	186000	787000	158000	274000	166000	1.1933	0.433648	-1.20541	down	C12633	ko00944
pme3369	Rhamnetin (7-O-methxyl quercetin)	Flavonol	3660	4790	6080	11500	14100	9660	1.76008	2.4267	1.279	up	C10176	--
pme3346	5-hydroxyhexanoic acid	Organic acids and derivatives	726000	1080000	373000	287000	253000	415000	1.39694	0.438274	-1.19009	down	--	--
pme3309	2-Methylglutaric acid	Organic acids and derivatives	536000	211000	196000	112000	63300	93500	1.59273	0.285048	-1.81072	down	--	--
pme3305	p-Coumaryl alcohol	Phenylpropanoids	32100	35000	66700	125000	58800	106000	1.39414	2.16592	1.11498	up	C02646	ko00940,ko01061,ko01100,ko01110
pme3300	Tricetin	Flavone	49000	51200	200000	807000	133000	148000	1.15556	3.62425	1.85768	up	C10192	ko00941
pme3146	Ureidoisobutyric acid	Organic acids and derivatives	83800	87900	81900	276000	125000	154000	1.60474	2.18849	1.12993	up	--	--
pme3096	Aminomalonic acid	Organic acids and derivatives	467000	282000	372000	984000	792000	499000	1.60312	2.02944	1.02108	up	C00872	--
pme2991	Scopoletin (7-Hydroxy-5-methoxycoumarin)	Phenylpropanoids	12800	12700	20600	17600	9	9	1.2704	0.382169	-1.38772	down	C01752	ko00940,ko01061,ko01110
pme2957	Naringenin chalcone	Flavanone	51000	54100	35900	283000	88300	92600	1.55772	3.29007	1.71812	up	C06561	ko00941,ko01061,ko01100,ko01110
pme2914	3-Hydroxy-3-methylpentane-1,5-dioic acid	Amino acid and derivatives	636000	336000	642000	2100000	1160000	782000	1.50928	2.50434	1.32443	up	C03761	--
pme2909	(-)-Sinigrin hydrate	Others	22800	32000	26500	12500	10800	13000	1.8356	0.446494	-1.16329	down	--	--
pme2895	Dihydromyricetin	Flavonol	40800	30600	29000	101000	173000	77400	1.79033	3.5	1.80735	up	C02906	ko00941,ko01110
pme2773	L-Cystathionine	Amino acid and derivatives	142000	95800	123000	9	94200	46400	1.02215	0.389715	-1.35951	down	C02291	ko00260,ko00270,ko01100,ko01110,ko01130,ko01230
pme2598	3,4-Dihydroxybenzeneacetic acid	Organic acids and derivatives	437000	371000	396000	1900000	824000	1500000	1.73023	3.50831	1.81077	up	--	--
pme2596	4-Pyridoxic acid	Alkaloids	405000	506000	785000	201000	9	235000	1.08697	0.257081	-1.95971	down	C00847	ko00750,ko01100,ko01120
pme2319	Hesperetin	Flavanone	11700	6190	19100	86300	21200	47200	1.47636	4.18221	2.06427	up	C01709	ko00941
pme2122	Histamine	Amino acid and derivatives	80100	116000	70500	9	63400	33800	1.03333	0.364625	-1.45551	down	C00388	ko00340,ko01065,ko01100,ko01110,ko04080,ko04664,ko04721,ko04750,ko04971,ko04974,ko05310,ko07227
pme1966	2-Aminoethanesulfonic acid	Organic acids and derivatives	13600	702000	27900	9	9	9	1.8199	3.63147e-05	-14.7491	down	C00245	ko00120,ko00430,ko00920,ko01100,ko02010,ko04080
pme1952	Riboflavin	Vitamins and derivatives	30200000	28000000	24600000	11500000	12900000	12700000	1.85868	0.448068	-1.15821	down	C00255	ko00740,ko01100,ko01110,ko04977
pme1816	Neochlorogenic acid (5-O-Caffeoylquinic acid)	Organic acids and derivatives	189000	200000	299000	812000	246000	341000	1.16188	2.03343	1.02392	up	C17147	--
pme1588	Isorhamnetin	Flavonol	36300	9650	9180	67100	30900	17800	1.16383	2.10049	1.07073	up	C10084	--
pme1580	Eriodictyol	Flavanone	295000	180000	278000	858000	484000	415000	1.61272	2.33333	1.22239	up	C05631	ko00941,ko01110
pme1539	Isorhamnetin 3-O-neohesperidoside	Flavonol	4910000	4320000	4820000	21600000	4670000	8320000	1.1771	2.46192	1.29978	up	--	--
pme1510	Baicalein (5,6,7-Trihydroxyflavone)	Flavone	18100	9	9	14700	30500	6650	1.34609	2.86179	1.51692	up	C10023	--
pme1500	Kumatakenin	Flavonol	9	9	9	108000	10800	18000	1.87282	5066.67	12.3068	up	--	--
pme1399	Xanthohumol	Flavanone	24000	135000	30700	17900	18300	36200	1.00507	0.381655	-1.38966	down	C16417	ko00941
pme1292	Homogentisic acid	Organic acids and derivatives	460000	374000	386000	1870000	872000	1450000	1.75522	3.43607	1.78076	up	C00544	ko00130,ko00350,ko00643,ko01100,ko01120
pme1104	L-Isoleucine	Amino acid and derivatives	36400	39500	27800	135000	37600	116000	1.35883	2.78303	1.47666	up	C00407	ko00280,ko00290,ko00460,ko00960,ko00966,ko00970,ko01060,ko01064,ko01100,ko01110,ko01130,ko01210,ko01230,ko02010,ko04974,ko04978,ko05230
pme1070	L-(-)-Tyrosine	Amino acid and derivatives	1420000	1210000	892000	4330000	1680000	2490000	1.54503	2.4134	1.27107	up	C00082	ko00130,ko00231,ko00261,ko00350,ko00360,ko00400,ko00401,ko00460,ko00680,ko00730,ko00940,ko00950,ko00965,ko00966,ko00970,ko01055,ko01059,ko01060,ko01063,ko01100,ko01110,ko01130,ko01210,ko01230,ko04728,ko04916,ko04917,ko04974,ko05012,ko05030,ko05031,ko05034,ko05230
pme1011	Benzamidine	Others	2330000	1390000	1890000	9	9	9	1.89365	4.81283e-06	-17.6647	down	C01784	--
pme0486	Methylmalonic acid	Organic acids and derivatives	12700000	7180000	9950000	24000000	21100000	14600000	1.64693	2.00134	1.00097	up	C02170	ko00240,ko00280,ko00640
pme0428	3,4,5-Trimethoxycinnamic acid	Phenylpropanoids	9	9	9	24600	9	13300	1.28848	1404.04	10.4554	up	--	--
pme0418	3-(4-Hydroxyphenyl)propionic acid	Phenylpropanoids	28300	22200	45500	93200	36700	81000	1.3096	2.19687	1.13545	up	C01744	--
pme0388	Homovanillic acid	Phenylpropanoids	9	9	278000	672000	285000	584000	1.3272	5.54281	2.47062	up	C05582	ko00350,ko01100,ko04728
pme0377	Naringenin	Flavanone	156000	9	9	622000	215000	305000	1.44187	7.31967	2.87178	up	C00509	ko00941,ko00943,ko01061,ko01100,ko01110
pme0307	Resveratrol	Phenylpropanoids	12200	9	9	37700	29400	227000	1.50268	24.071	4.58923	up	C03582	ko00945,ko01061,ko01110,ko04211,ko04212
pme0284	4-Guanidinobutyric acid	Organic acids and derivatives	78500	215000	56900	39100	17600	108000	1.08879	0.470034	-1.08916	down	C01035	ko00330,ko01100
pme0267	2-Methylsuccinic acid	Organic acids and derivatives	6350000	3380000	6180000	29200000	7830000	17100000	1.47864	3.40226	1.76649	up	--	--
pme0245	Adipic acid	Organic acids and derivatives	521000	165000	208000	133000	77200	87800	1.46827	0.333333	-1.58496	down	C06104	ko00930,ko01100,ko01120,ko01220
pme0230	Adenosine	Nucleotide and derivates	13000000	9710000	8120000	3750000	6250000	5200000	1.62815	0.493026	-1.02026	down	C00212	ko00230,ko01100,ko04022,ko04024,ko04071,ko04080,ko04270,ko04923,ko04924,ko05012,ko05032,ko05034
pme0205	Catechin	Polyphenol	302000	463000	811000	2050000	731000	1990000	1.40124	3.02728	1.59802	up	C06562	ko00941,ko01061,ko01110
pme0075	N-Acetyl-L-glutamic acid	Amino acid and derivatives	860000	2810000	639000	400000	496000	1080000	1.0104	0.458575	-1.12477	down	C00624	ko00220,ko01100,ko01110,ko01130,ko01210,ko01230
pme0050	L-Tryptophan	Amino acid and derivatives	5710000	5020000	4380000	22600000	13300000	19900000	1.82341	3.69292	1.88476	up	C00078	ko00260,ko00380,ko00400,ko00404,ko00901,ko00966,ko00970,ko01060,ko01061,ko01063,ko01070,ko01100,ko01110,ko01130,ko01210,ko01230,ko04726,ko04974,ko04978,ko05143,ko05230
pme0021	L-Phenylalanine	Amino acid and derivatives	11800000	10000000	13400000	39800000	27900000	29000000	1.82452	2.74716	1.45794	up	C00079	ko00360,ko00400,ko00460,ko00940,ko00960,ko00966,ko00970,ko01060,ko01061,ko01063,ko01064,ko01070,ko01100,ko01110,ko01130,ko01210,ko01230,ko02010,ko04974,ko04978,ko05230
pme0005	Purine	Nucleotide and derivates	261000	147000	292000	9	134000	9	1.33754	0.191454	-2.38493	down	C15587	--
pmc0960	LysoPC 20:4	Lipids	4120000	7740000	4130000	16000000	8050000	12100000	1.55785	2.26079	1.17683	up	--	--
pmc0274	6-Methylmercaptopurine	Nucleotide and derivates	3030000	2770000	3340000	9480000	7110000	7590000	1.85182	2.64551	1.40355	up	C16614	ko00983
pmb5304	α-Linolenic acid	Lipids	6370	6630	5920	11100	16400	11600	1.8106	2.0666	1.04726	up	C06427	ko00592,ko01040,ko01060,ko01070,ko01100,ko01110
pmb3132	LysoPE 18:1 (2n isomer)	Lipids	928000	1410000	937000	4190000	2720000	3710000	1.80424	3.24275	1.69722	up	--	--
pmb3121	LysoPE 18:1	Lipids	793000	1220000	793000	3720000	2310000	3240000	1.79515	3.30364	1.72405	up	--	--
pmb3101	2-Isopropylmalate	Organic acids and derivatives	8570000	10400000	4160000	3030000	1710000	4730000	1.4335	0.409425	-1.28833	down	C02504	ko00290,ko00620,ko01100,ko01110,ko01210,ko01230
pmb3075	3-O-p-Coumaroyl shikimic acid	Organic acids and derivatives	29500	13400	26100	101000	28700	43000	1.29592	2.5029	1.3236	up	--	--
pmb3074	3-O-p-Coumaroyl quinic acid	Organic acids and derivatives	436000	356000	442000	1010000	534000	1210000	1.49861	2.23177	1.15819	up	--	--
pmb3061	5-O-p-coumaroyl quinic acid O-hexoside	Organic acids and derivatives	39700	17900	29200	9530	9	17800	1.105	0.314965	-1.66673	down	--	--
pmb3052	Tricin 4'-O-β-guaiacylglycerol	Flavone	2170000	3000000	3960000	8930000	3330000	6140000	1.27678	2.01533	1.01102	up	--	--
pmb3043	Tricin 5-O-rutinoside	Flavone	16500	22700	30400	48600	38000	63200	1.55832	2.1523	1.10588	up	--	--
pmb3039	Tricin O-oxalic acid O-coumaroyl shikimic acid	Flavone	282000	348000	489000	1160000	440000	836000	1.36483	2.17694	1.1223	up	--	--
pmb3028	Tricin O-sinapic acid	Flavone	26400	32400	34900	104000	28300	68300	1.15543	2.14088	1.0982	up	--	--
pmb2673	3-(6-Hydroxy-3,4-dioxo-1,5-cyclohexadien-1-yl)-L-alanine	Amino acid and derivatives	16500	22300	24900	46700	19500	73600	1.09346	2.19466	1.134	up	--	--
pmb2556	Syringaldehyde O-glucoside	Organic acids and derivatives	335000	410000	268000	98600	211000	166000	1.58169	0.469497	-1.09081	down	--	--
pmb2406	LysoPC 17:0	Lipids	895000	862000	622000	1970000	2000000	1480000	1.83448	2.29088	1.1959	up	--	--
pmb2325	MAG (18:3) isomer2	Lipids	4200000	21200000	5430000	2230000	3630000	6560000	1.03787	0.402854	-1.31167	down	--	--
pmb2319	LysoPC 15:0	Lipids	52500	76700	59800	181000	86700	156000	1.56618	2.2418	1.16466	up	--	--
pmb1912	10-Formyl-THF	Organic acids and derivatives	7370000	4640000	4210000	27200000	6360000	7500000	1.18994	2.53144	1.33996	up	C00234	ko00670,ko00720,ko00970,ko01100,ko01120,ko01200,ko01523
pmb1626	MGMG (18:2) isomer1	Lipids	20800	136000	61200	16700	15100	53600	1.08594	0.391743	-1.35202	down	--	--
pmb1605	MAG (18:3) isomer3	Lipids	2800000	14800000	3660000	1340000	2290000	4260000	1.0859	0.371119	-1.43004	down	--	--
pmb1530	Phytocassane D	Terpene	490000	431000	297000	158000	152000	167000	1.77904	0.391626	-1.35245	down	--	--
pmb0885	4-oxo-9Z,11Z,13E,15E-octadecatetraenoic acid	Lipids	309000	188000	232000	141000	73100	122000	1.62693	0.461043	-1.11703	down	--	--
pmb0818	Methoxyindoleacetic acid	Indole derivatives	1350000	1080000	1160000	5920000	3440000	4510000	1.83584	3.86351	1.94991	up	C05660	ko00380
pmb0801	4-Pyridoxic acid O-hexoside	Vitamins and derivatives	12400000	12900000	18600000	5710000	7680000	6830000	1.78415	0.460592	-1.11844	down	--	--
pmb0769	N-hexosyl-p-coumaroyl serotonin	Alkaloids	239000	285000	176000	51900	101000	189000	1.42718	0.488429	-1.03378	down	--	--
pmb0751	5-O-p-Coumaroyl shikimic acid	Organic acids and derivatives	53500	31900	40600	63100	254000	102000	1.48072	3.32619	1.73387	up	--	--
pmb0663	8-C-hexosyl-luteolin O-hexoside	Flavone	8010	32000	64900	9	15200	9	1.34406	0.145058	-2.7853	down	--	--
pmb0613	Apigenin 6-C-hexosyl-8-C-hexosyl-O-hexoside	Flavone	340000	337000	108000	70800	178000	72800	1.17588	0.409682	-1.28743	down	--	--
pmb0426	5-Methoxy-N,N-dimethyltryptamine	Alkaloids	9	9	47100	61700	19700	67800	1.25483	3.16652	1.6629	up	C08309	--
pmb0423	Hydroxy-methoxycinnamate	Phenylpropanoids	1530000	2560000	1330000	4780000	3150000	2910000	1.60097	2	1	up	--	--
pmb0404	Arabidopyl shikimic acid	Organic acids and derivatives	99600	88000	85900	383000	111000	206000	1.42196	2.55941	1.35581	up	--	--
pmb0197	N2-methylguanosine	Nucleotide and derivates	27400	22100	14600	66500	39000	35100	1.62245	2.19345	1.1332	up	--	--
pmb0165	LysoPC 16:1	Lipids	1360000	717000	1590000	6380000	3610000	4090000	1.72779	3.83965	1.94098	up	--	--
pmb0163	DGMG (18:2) isomer3	Lipids	19300	139000	33900	15200	14600	38500	1.00988	0.355359	-1.49265	down	--	--
pmb0159	DGMG (18:2) isomer2	Lipids	30700	145000	31200	17400	22200	42600	1.01488	0.397293	-1.33172	down	--	--
pma6558	Velutin	Flavone	15300	9	9	306000	40200	67500	1.54348	27.0074	4.75529	up	--	--
pma2405	Feruloylcholine	Alkaloids	67900	154000	212000	834000	327000	214000	1.39107	3.16893	1.664	up	--	--
pma1751	Nicotinic acid-hexoside	Vitamins and derivatives	467000	672000	736000	167000	225000	519000	1.51582	0.485867	-1.04137	down	--	--
pma1303	LysoPC 16:2	Lipids	242000	195000	78700	704000	268000	298000	1.39913	2.46267	1.30022	up	--	--
pma0633	N-p-coumaroylspermine	Phenolamides	95300	81000	82000	9	9	31600	1.54116	0.122408	-3.03023	down	--	--
