# Supplementary material for: Iron Deficiency Leads to Chlorosis Through Impacting Chlorophyll Synthesis and Nitrogen Metabolism in Areca catechu L
Source: Front Plant Sci. 2021 Aug 2;12:710093. doi: 10.3389/fpls.2021.710093 (PMC8365612; doi:10.3389/fpls.2021.710093)
Supplement: Supplementary file 6 [file Data_Sheet_6.XLSX]

## Sheet: Sheet1
Index	Compounds	Class	ID-1	ID-2	ID-3	EI-1	EI-2	EI-3	VIP	Fold_Change	Log2FC	Type	cpd_ID	kegg_map
pma0633	N-p-coumaroylspermine	Phenolamides	9	9	31600	39900	65700	48900	1.27765	4.88646	2.28879	up	--	--
pma1303	LysoPC 16:2	Lipids	704000	268000	298000	64800	70900	55900	1.6363	0.150866	-2.72866	down	--	--
pma1751	Nicotinic acid-hexoside	Vitamins and derivatives	167000	225000	519000	1300000	1670000	4780000	1.56728	8.50714	3.08867	up	--	--
pma2405	Feruloylcholine	Alkaloids	834000	327000	214000	142000	195000	200000	1.18515	0.390545	-1.35644	down	--	--
pma6558	Velutin	Flavone	306000	40200	67500	13200	15000	30100	1.33518	0.140923	-2.82702	down	--	--
pma6625	E-3,4,5'-Trihydroxy-3'-glucopyranosylstilbene	Others	144000	164000	42400	338000	531000	660000	1.48686	4.36358	2.12551	up	--	--
pmb0165	LysoPC 16:1	Lipids	6380000	3610000	4090000	1330000	1900000	2550000	1.48323	0.410511	-1.28451	down	--	--
pmb0197	N2-methylguanosine	Nucleotide and derivates	66500	39000	35100	9	9	17700	1.28038	0.126017	-2.98831	down	--	--
pmb0235	O-Feruloyl coumarin	Phenylpropanoids	89900	46900	76300	47600	9	9	1.27579	0.223454	-2.16195	down	--	--
pmb0296	MAG (18:1) isomer2	Lipids	410000	379000	1020000	95900	231000	453000	1.07178	0.431122	-1.21383	down	--	--
pmb0325	N-Feruloyl spermidine	Phenolamides	9	9	197000	323000	311000	225000	1.25977	4.36001	2.12433	up	--	--
pmb0404	Arabidopyl shikimic acid	Organic acids and derivatives	383000	111000	206000	133000	99300	109000	1.09643	0.487571	-1.03631	down	--	--
pmb0423	Hydroxy-methoxycinnamate	Phenylpropanoids	4780000	3150000	2910000	1460000	1510000	1300000	1.6365	0.393911	-1.34406	down	--	--
pmb0426	5-Methoxy-N,N-dimethyltryptamine	Alkaloids	61700	19700	67800	9	59000	9	1.20382	0.395563	-1.33802	down	C08309	--
pmb0493	N'-p-Coumaroyl agmatine	Phenolamides	9	9	121000	242000	107000	182000	1.25886	4.38778	2.13349	up	--	--
pmb0514	Adenosine 3'-monophosphate	Nucleotide and derivates	4610000	6380000	6960000	18200000	15600000	12000000	1.60726	2.55153	1.35136	up	C01367	ko00230
pmb0618	8-C-hexosyl-hesperetin O-hexoside	Flavone	1610000	1670000	1540000	771000	1060000	539000	1.55256	0.491701	-1.02415	down	--	--
pmb0661	Chrysoeriol C-hexosyl-O-rhamnoside	Flavone	692000	1990000	518000	402000	406000	469000	1.15738	0.399062	-1.32531	down	--	--
pmb0665	Luteolin 8-C-hexosyl-O-hexoside	Flavone	1750000	4760000	1110000	869000	790000	903000	1.24949	0.33622	-1.57252	down	--	--
pmb0711	Quercetin 7-O-rutinoside	Flavonol	897000	2310000	604000	429000	536000	463000	1.23918	0.374705	-1.41617	down	--	--
pmb0751	5-O-p-Coumaroyl shikimic acid	Organic acids and derivatives	63100	254000	102000	9	9	9	1.72042	6.44238e-05	-13.922	down	--	--
pmb0801	4-Pyridoxic acid O-hexoside	Vitamins and derivatives	5710000	7680000	6830000	21300000	19900000	15500000	1.66459	2.80415	1.48757	up	--	--
pmb0818	Methoxyindoleacetic acid	Indole derivatives	5920000	3440000	4510000	894000	886000	1360000	1.65016	0.226388	-2.14313	down	C05660	ko00380
pmb0848	LysoPC 16:1 (2n isomer)	Lipids	5800000	5260000	5990000	2610000	1850000	1770000	1.68139	0.365396	-1.45247	down	--	--
pmb0854	LysoPC 18:3	Lipids	1290000	1020000	1150000	530000	438000	352000	1.67484	0.381503	-1.39023	down	--	--
pmb0855	LysoPC 16:0	Lipids	4300000	4010000	4670000	2320000	2050000	1550000	1.65971	0.456086	-1.13262	down	--	--
pmb0865	LysoPC 18:3 (2n isomer)	Lipids	2870000	3670000	3630000	1510000	892000	681000	1.61893	0.303147	-1.72191	down	--	--
pmb0882	LysoPC 18:1	Lipids	3870000	2000000	3190000	1320000	1090000	1690000	1.46205	0.452539	-1.14389	down	--	--
pmb0883	LysoPE 18:0	Lipids	101000	108000	65600	25300	29900	36400	1.62535	0.333576	-1.58391	down	--	--
pmb0885	4-oxo-9Z,11Z,13E,15E-octadecatetraenoic acid	Lipids	141000	73100	122000	307000	410000	574000	1.61751	3.84112	1.94153	up	--	--
pmb0896	N'-Feruloyl putrescine	Phenolamides	45000000	24400000	23800000	11000000	16300000	8510000	1.50389	0.384227	-1.37997	down	--	--
pmb0907	N-Feruloyl putrescine	Phenolamides	1590000	892000	757000	378000	539000	305000	1.50595	0.377277	-1.4063	down	C10497	ko00330
pmb0981	Adenosine 5'-monophosphate	Nucleotide and derivates	3840000	6900000	6390000	18000000	14100000	11400000	1.54751	2.5394	1.34449	up	C00020	ko00230,ko00908,ko01060,ko01065,ko01070,ko01100,ko01110,ko01130,ko01523,ko04022,ko04024,ko04068,ko04150,ko04151,ko04152,ko04211,ko04740,ko04742,ko04923,ko04924,ko04925,ko04927,ko04928,ko04934,ko05012,ko05032
pmb1178	O-Feruloyl 2-hydroxylcoumarin	Phenylpropanoids	434000	187000	852000	1020000	1540000	523000	1.02927	2.09301	1.06558	up	--	--
pmb1530	Phytocassane D	Terpene	158000	152000	167000	441000	464000	580000	1.7149	3.11321	1.6384	up	--	--
pmb1587	4-Hydroxy-3,5-diisopropylbenzaldehyde	Organic acids and derivatives	112000	111000	113000	305000	435000	426000	1.70203	3.47024	1.79503	up	--	--
pmb1656	MAG (18:3) isomer4	Lipids	155000	179000	143000	86900	67400	70200	1.67192	0.47065	-1.08727	down	--	--
pmb2319	LysoPC 15:0	Lipids	181000	86700	156000	55700	57600	42200	1.54857	0.367005	-1.44613	down	--	--
pmb2363	MAG (18:1) isomer1	Lipids	416000	421000	899000	136000	244000	444000	1.13834	0.474654	-1.07505	down	--	--
pmb2388	LysoPC 18:0 (2n isomer)	Lipids	749000	339000	609000	256000	219000	305000	1.40397	0.459635	-1.12144	down	--	--
pmb2406	LysoPC 17:0	Lipids	1970000	2000000	1480000	404000	395000	516000	1.69322	0.241284	-2.05119	down	--	--
pmb2654	Anthranilate O-hexosyl-O-hexoside	Organic acids and derivatives	243000	165000	189000	105000	76200	52000	1.57635	0.39062	-1.35616	down	--	--
pmb2673	3-(6-Hydroxy-3,4-dioxo-1,5-cyclohexadien-1-yl)-L-alanine	Amino acid and derivatives	46700	19500	73600	9	9	54700	1.13963	0.391402	-1.35328	down	--	--
pmb2786	9-HOTrE	Lipids	27800	41600	20100	39900	9	9	1.20189	0.446011	-1.16485	down	--	--
pmb2871	2,5-dihydroxy benzoic acid O-hexside	Organic acids and derivatives	5810000	7260000	1260000	15800000	14900000	25700000	1.39731	3.9358	1.97666	up	--	--
pmb2928	Gallic acid O-Hexoside	Organic acids and derivatives	1990000	1600000	1480000	5380000	4180000	8710000	1.63362	3.60355	1.84942	up	--	--
pmb2936	Disinapoyl hexoside	Phenylpropanoids	437000	136000	218000	810000	1130000	444000	1.35354	3.01391	1.59163	up	--	--
pmb2954	Luteolin O-hexosyl-O-hexosyl-O-hexoside	Flavone	346000	639000	149000	179000	134000	164000	1.1029	0.420635	-1.24936	down	--	--
pmb2981	Apigenin C-hexosyl-O-rutinoside	Flavone	488000	636000	294000	254000	230000	58500	1.28614	0.382581	-1.38616	down	--	--
pmb3002	Chrysoeriol 7-O-rutinoside	Flavone	18300000	45400000	12600000	9490000	10600000	12700000	1.15163	0.429751	-1.21843	down	--	--
pmb3006	Apigenin 7-O-glucoside (Cosmosiin)	Flavone	8440000	31400000	2830000	3750000	2420000	3620000	1.02576	0.229435	-2.12384	down	C04608	ko00944
pmb3043	Tricin 5-O-rutinoside	Flavone	48600	38000	63200	18300	14800	9	1.0523	0.221021	-2.17774	down	--	--
pmb3044	Tricin di-O-hexoside	Flavone	129000	60300	113000	370000	280000	223000	1.52945	2.88786	1.53	up	--	--
pmb3055	p-Coumaroyl quinic acid O-glucuronic acid	Organic acids and derivatives	49800	28700	49200	98900	115000	266000	1.52603	3.75803	1.90998	up	--	--
pmb3059	Quinic acid O-di-glucuronic acid	Organic acids and derivatives	27500	22300	21000	67600	59400	99700	1.66433	3.20198	1.67896	up	--	--
pmb3061	5-O-p-coumaroyl quinic acid O-hexoside	Organic acids and derivatives	9530	9	17800	60700	89500	82000	1.13204	8.49336	3.08634	up	--	--
pmb3064	3-O-p-coumaroyl quinic acid O-hexoside	Organic acids and derivatives	9	9	16600	60800	71700	83600	1.3737	13.004	3.70088	up	--	--
pmb3066	5-O-p-coumaroyl shikimic acid O-hexoside	Organic acids and derivatives	70700	126000	68200	39000	9	9	1.31487	0.147293	-2.76324	down	--	--
pmb3072	3-O-p-coumaroyl shikimic acid O-hexoside	Organic acids and derivatives	163000	96200	132000	58600	67900	55600	1.58585	0.465491	-1.10318	down	--	--
pmb3074	3-O-p-Coumaroyl quinic acid	Organic acids and derivatives	1010000	534000	1210000	308000	228000	333000	1.53814	0.315541	-1.6641	down	--	--
pmb3075	3-O-p-Coumaroyl shikimic acid	Organic acids and derivatives	101000	28700	43000	22900	28000	24900	1.16741	0.438911	-1.188	down	--	--
pmb3101	2-Isopropylmalate	Organic acids and derivatives	3030000	1710000	4730000	6290000	9830000	15500000	1.47417	3.33897	1.7394	up	C02504	ko00290,ko00620,ko01100,ko01110,ko01210,ko01230
pmb3117	LysoPE 16:0	Lipids	12300000	16000000	12400000	5180000	5050000	5610000	1.69144	0.389189	-1.36146	down	--	--
pmb3121	LysoPE 18:1	Lipids	3720000	2310000	3240000	626000	639000	1330000	1.56417	0.279935	-1.83683	down	--	--
pmb3132	LysoPE 18:1 (2n isomer)	Lipids	4190000	2720000	3710000	719000	757000	1540000	1.56887	0.283992	-1.81608	down	--	--
pmb5304	α-Linolenic acid	Lipids	11100	16400	11600	3230	6830	5340	1.52566	0.393862	-1.34424	down	C06427	ko00592,ko01040,ko01060,ko01070,ko01100,ko01110
pmc0274	6-Methylmercaptopurine	Nucleotide and derivates	9480000	7110000	7590000	2290000	2120000	1300000	1.68132	0.236146	-2.08225	down	C16614	ko00983
pmc0960	LysoPC 20:4	Lipids	16000000	8050000	12100000	4540000	3820000	5890000	1.51903	0.394191	-1.34303	down	--	--
pmd0132	LysoPC 16:0 (2n isomer)	Lipids	4110000	3970000	4840000	2300000	2060000	1540000	1.64983	0.456656	-1.13082	down	--	--
pmd0136	LysoPC 18:0	Lipids	18700000	31200000	21400000	7860000	7350000	6050000	1.66657	0.298177	-1.74576	down	--	--
pmd0144	LysoPC 20:1 (2n isomer)	Lipids	136000	115000	125000	52300	71400	60500	1.66211	0.489894	-1.02946	down	--	--
pmd0145	LysoPC 20:1	Lipids	177000	137000	133000	49200	72800	64400	1.63647	0.417002	-1.26187	down	--	--
pmd0160	LysoPE 16:0 (2n isomer)	Lipids	16700000	21500000	15700000	7060000	6780000	7740000	1.67993	0.400371	-1.32059	down	--	--
pme0005	Purine	Nucleotide and derivates	9	134000	9	488000	324000	513000	1.31588	9.88673	3.30549	up	C15587	--
pme0008	L-Citrulline	Amino acid and derivatives	20800000	6510000	14400000	5090000	4460000	3970000	1.43049	0.324143	-1.6253	down	C00327	ko00220,ko01100,ko01110,ko01130,ko01230
pme0021	L-Phenylalanine	Amino acid and derivatives	39800000	27900000	29000000	9200000	8480000	5090000	1.6708	0.235471	-2.08638	down	C00079	ko00360,ko00400,ko00460,ko00940,ko00960,ko00966,ko00970,ko01060,ko01061,ko01063,ko01064,ko01070,ko01100,ko01110,ko01130,ko01210,ko01230,ko02010,ko04974,ko04978,ko05230
pme0022	L-Threonine	Amino acid and derivatives	237000	233000	332000	127000	118000	89900	1.63526	0.417581	-1.25987	down	C00188	ko00260,ko00261,ko00290,ko00860,ko00970,ko01060,ko01100,ko01110,ko01120,ko01130,ko01230,ko02010,ko04974,ko04978
pme0050	L-Tryptophan	Amino acid and derivatives	22600000	13300000	19900000	3860000	3670000	5740000	1.64327	0.237814	-2.0721	down	C00078	ko00260,ko00380,ko00400,ko00404,ko00901,ko00966,ko00970,ko01060,ko01061,ko01063,ko01070,ko01100,ko01110,ko01130,ko01210,ko01230,ko04726,ko04974,ko04978,ko05143,ko05230
pme0056	2,3-dimethylsuccinic acid	Amino acid and derivatives	293000	222000	158000	653000	609000	541000	1.61072	2.67905	1.42172	up	--	--
pme0108	5-Methylcytosine	Nucleotide and derivates	390000	293000	363000	62800	76200	35700	1.6824	0.167017	-2.58193	down	C02376	ko00240
pme0122	N6-Acetyl-L-lysine	Amino acid and derivatives	2510000	1670000	1590000	489000	758000	1110000	1.46289	0.408492	-1.29162	down	C02727	ko00310
pme0124	Glycyl-L-proline	Amino acid and derivatives	57300	29900	27300	15200	11000	9500	1.5682	0.31179	-1.68135	down	--	--
pme0138	Nα-Acetyl-L-glutamine	Amino acid and derivatives	35300000	26900000	26000000	6340000	4510000	7000000	1.6859	0.202381	-2.30485	down	--	--
pme0173	N-Propionylglycine	Amino acid and derivatives	300000	251000	263000	97900	166000	136000	1.5751	0.491278	-1.02539	down	--	--
pme0195	L-Cysteine	Amino acid and derivatives	45000	12200	41600	8500	9	9	1.3621	0.0862146	-3.53592	down	C00097	ko00260,ko00270,ko00311,ko00332,ko00430,ko00460,ko00480,ko00730,ko00770,ko00920,ko00970,ko01060,ko01100,ko01110,ko01120,ko01130,ko01200,ko01230,ko04122,ko04216,ko04974,ko05230
pme0205	Catechin	Polyphenol	2050000	731000	1990000	191000	325000	535000	1.46096	0.220289	-2.18253	down	C06562	ko00941,ko01061,ko01110
pme0226	L-Asparagine	Amino acid and derivatives	953000	290000	819000	207000	221000	280000	1.33467	0.343356	-1.54222	down	C00152	ko00250,ko00460,ko00970,ko01060,ko01100,ko01110,ko01230,ko04974,ko04978,ko05230
pme0245	Adipic acid	Organic acids and derivatives	133000	77200	87800	683000	621000	249000	1.5493	5.21141	2.38167	up	C06104	ko00930,ko01100,ko01120,ko01220
pme0252	N-Acetyl-l-leucine	Amino acid and derivatives	12600000	8210000	7170000	3480000	3370000	6180000	1.41248	0.46569	-1.10256	down	C02710	--
pme0264	Thymidine	Nucleotide and derivates	9	168000	84400	9	9	9	1.21492	0.000106969	-13.1905	down	C00214	ko00240,ko01100
pme0270	Maleic acid	Organic acids and derivatives	564000	217000	421000	168000	145000	153000	1.44566	0.387687	-1.36704	down	C01384	ko00350,ko00650,ko00760,ko01120
pme0307	Resveratrol	Phenylpropanoids	37700	29400	227000	9	9	9	1.70694	9.18055e-05	-13.4111	down	C03582	ko00945,ko01061,ko01110,ko04211,ko04212
pme0333	Apigenin 7-O-neohesperidoside (Rhoifolin)	Flavone	1030000	1390000	572000	368000	430000	631000	1.28818	0.477607	-1.0661	down	C12627	ko00944
pme0359	Apigenin 5-O-glucoside	Flavone	3040000	4900000	2280000	1400000	1380000	2220000	1.33896	0.489237	-1.0314	down	--	--
pme0377	Naringenin	Flavanone	622000	215000	305000	9	9	489000	1.14588	0.428212	-1.2236	down	C00509	ko00941,ko00943,ko01061,ko01100,ko01110
pme0379	Apigenin	Flavone	5580000	13800000	794000	821000	655000	972000	1.18191	0.121344	-3.04282	down	C01477	ko00941,ko00943,ko00944,ko01061,ko01100,ko01110
pme0436	Procyanidin B3	Proanthocyanidins	689000	721000	1240000	280000	473000	359000	1.49828	0.419623	-1.25284	down	--	--
pme0450	L-Epicatechin	Polyphenol	4290000	1830000	2130000	1410000	1460000	1100000	1.34312	0.481212	-1.05526	down	C09727	ko00941,ko01061,ko01110
pme1011	Benzamidine	Others	9	9	9	3960000	3010000	4270000	1.72714	416296	18.6673	up	C01784	--
pme1070	L-(-)-Tyrosine	Amino acid and derivatives	4330000	1680000	2490000	351000	243000	254000	1.6716	0.0997647	-3.32533	down	C00082	ko00130,ko00231,ko00261,ko00350,ko00360,ko00400,ko00401,ko00460,ko00680,ko00730,ko00940,ko00950,ko00965,ko00966,ko00970,ko01055,ko01059,ko01060,ko01063,ko01100,ko01110,ko01130,ko01210,ko01230,ko04728,ko04916,ko04917,ko04974,ko05012,ko05030,ko05031,ko05034,ko05230
pme1104	L-Isoleucine	Amino acid and derivatives	135000	37600	116000	24800	18900	13600	1.50085	0.198545	-2.33246	down	C00407	ko00280,ko00290,ko00460,ko00960,ko00966,ko00970,ko01060,ko01064,ko01100,ko01110,ko01130,ko01210,ko01230,ko02010,ko04974,ko04978,ko05230
pme1184	Deoxyguanosine	Nucleotide and derivates	9	9	24000	41300	53000	70200	1.31361	6.84903	2.7759	up	C00330	ko00230,ko01100
pme1201	Phloretin	Flavanone	10600	25300	21200	9	9	9	1.72213	0.000472855	-11.0463	down	C00774	ko00941,ko01110
pme1283	S-(5'-Adenosy)-L-homocysteine	Amino acid and derivatives	304000	117000	356000	407000	537000	794000	1.29694	2.23681	1.16144	up	C00021	ko00270,ko01100,ko01230
pme1292	Homogentisic acid	Organic acids and derivatives	1870000	872000	1450000	374000	283000	387000	1.61799	0.249046	-2.00552	down	C00544	ko00130,ko00350,ko00643,ko01100,ko01120
pme1376	2'-Deoxycytidine-5'-monophosphate	Nucleotide and derivates	139000	351000	152000	82900	46000	49700	1.50781	0.278193	-1.84584	down	C00239	ko00240,ko01100
pme1453	Melatonin	Alkaloids	241000	9	120000	9	9	9	1.21667	7.47904e-05	-13.7068	down	C01598	ko00380,ko01100,ko04080,ko04713
pme1500	Kumatakenin	Flavonol	108000	10800	18000	9	9	12700	1.24872	0.0929678	-3.42712	down	--	--
pme1510	Baicalein (5,6,7-Trihydroxyflavone)	Flavone	14700	30500	6650	9	9	9	1.7158	0.000520733	-10.9072	down	C10023	--
pme1580	Eriodictyol	Flavanone	858000	484000	415000	244000	231000	329000	1.42863	0.457598	-1.12785	down	C05631	ko00941,ko01110
pme1715	L-Saccharopine	Amino acid and derivatives	615000	1480000	694000	511000	331000	258000	1.39073	0.394407	-1.34224	down	C00449	ko00300,ko00310,ko01100,ko01110,ko01130,ko01230
pme1806	Chlorogenic acid methyl ester	Organic acids and derivatives	234000	26400	168000	265000	299000	305000	1.05901	2.02848	1.0204	up	--	--
pme1841	1,5-Diaminopentane	Phenolamides	43200	59300	22000	24700	17700	17700	1.2692	0.482731	-1.05071	down	C01672	ko00310,ko00480,ko00960,ko01060,ko01064,ko01100,ko01110,ko04974
pme1944	D-Mannitol	Alcohols	359000	1350000	445000	165000	244000	198000	1.36775	0.281801	-1.82725	down	C00392	ko00051,ko02010,ko02060
pme1977	Suberic acid	Organic acids and derivatives	127000	62900	112000	299000	295000	145000	1.37217	2.44783	1.2915	up	C08278	--
pme2142	L-Theanine	Amino acid and derivatives	3010000	2090000	1820000	423000	496000	431000	1.69779	0.195087	-2.35781	down	C01047	--
pme2241	Citraconic acid	Organic acids and derivatives	7790000	4520000	4460000	1340000	3730000	1580000	1.40474	0.396541	-1.33446	down	C02226	ko00290,ko00660,ko01100,ko01210
pme2433	Diethanolamine	Others	12900	5810	20800	9	9	9	1.71652	0.000683371	-10.515	down	C06772	ko00564
pme2569	(5-L-Glutamyl)-L-amino acid	Amino acid and derivatives	564000	865000	928000	328000	326000	292000	1.6268	0.401358	-1.31704	down	C03740	ko00480,ko01100
pme2598	3,4-Dihydroxybenzeneacetic acid	Organic acids and derivatives	1900000	824000	1500000	378000	292000	379000	1.60319	0.248343	-2.0096	down	--	--
pme2639	Enterodiol	Alcohols	70100	503000	265000	55900	9	9	1.34547	0.06672	-3.90574	down	C18166	--
pme2698	Phe-Phe	Amino acid and derivatives	157000	188000	166000	44900	75200	60200	1.65367	0.352838	-1.50292	down	--	--
pme2735	S-(5'-Adenosyl)-L-methionine	Amino acid and derivatives	54800000	38800000	38600000	15000000	17100000	5600000	1.54086	0.285174	-1.81009	down	C00019	ko00261,ko00270,ko00330,ko00908,ko01060,ko01070,ko01100,ko01110,ko01130,ko01230,ko04122
pme2890	L-Homocystine	Amino acid and derivatives	149000	210000	94600	93400	71400	29000	1.30154	0.427249	-1.22685	down	C01817	ko00270
pme2895	Dihydromyricetin	Flavonol	101000	173000	77400	13900	9	21800	1.10273	0.101619	-3.29875	down	C02906	ko00941,ko01110
pme2984	Isosakuranetin-7-neohesperidoside (Poncirin)	Flavanone	118000	787000	68600	9	9	68000	1.25862	0.0698624	-3.83934	down	C09830	--
pme3038	5-oxoproline	Amino acid and derivatives	464000	462000	430000	9	9	9	1.72675	1.99115e-05	-15.616	down	C01879	ko00480,ko01100
pme3146	Ureidoisobutyric acid	Organic acids and derivatives	276000	125000	154000	21100	29000	33800	1.6502	0.151171	-2.72575	down	--	--
pme3163	D-Sedoheptuiose 7-phosphate	Carbohydrates	778000	385000	479000	1430000	829000	1040000	1.39222	2.00914	1.00657	up	--	--
pme3210	Genistein 7-O-Glucoside (Genistin)	Isoflavone	2510000	3700000	1840000	1140000	953000	1640000	1.41027	0.463727	-1.10865	down	C09126	ko00943
pme3309	2-Methylglutaric acid	Organic acids and derivatives	112000	63300	93500	557000	607000	203000	1.51828	5.08557	2.34641	up	--	--
pme3346	5-hydroxyhexanoic acid	Organic acids and derivatives	287000	253000	415000	622000	795000	1110000	1.58663	2.64607	1.40385	up	--	--
pme3349	8-Hydroxy-2-deoxyguanosine	Nucleotide and derivates	24300	16200	28700	49600	54400	121000	1.5154	3.25145	1.70108	up	--	--
pme3388	H-HomoArg-OH	Amino acid and derivatives	11000000	9450000	6120000	2780000	2100000	2710000	1.6442	0.285661	-1.80763	down	C01924	--
pme3407	Laricitrin	Flavonol	158000	274000	166000	392000	168000	700000	1.01409	2.10702	1.07521	up	C12633	ko00944
pme3967	2-(dimethylamino)guanosine	Nucleotide and derivates	5900000	3870000	3780000	527000	649000	382000	1.70337	0.114982	-3.12053	down	--	--
pme3970	β-Pseudouridine	Nucleotide and derivates	1240000	1060000	749000	113000	48800	56300	1.69048	0.0715316	-3.80527	down	C02067	ko00240
pme3982	Hypoxanthine-9-β-D-arabinofuranoside	Nucleotide and derivates	286000	263000	322000	787000	778000	457000	1.54518	2.32147	1.21504	up	--	--
pmf0006	Narirutin	Flavone	4650000	7950000	3000000	2260000	2420000	2860000	1.28764	0.483333	-1.04891	down	C09793	--
pmf0057	4,2',4',6'-Tetrahydroxychalcone	Flavone	41500	19600	19300	9	9	28900	1.16021	0.359677	-1.47523	down	C06561	ko00941,ko01061,ko01100,ko01110
pmf0096	Oxalic acid	Organic acids and derivatives	17600	33400	25800	105000	96000	63700	1.59798	3.44661	1.78518	up	C00209	ko00230,ko00625,ko00630,ko01100,ko01120
pmf0102	Ajmaline	Alkaloids	62900	110000	208000	273000	148000	354000	1.17254	2.03465	1.02478	up	C06542	ko00901,ko01110
pmf0176	Piceatannol	Phenylpropanoids	127000	17600	121000	9	9	9	1.70773	0.000101657	-13.264	down	C05901	ko00945,ko01110
pmf0196	Phosphoenolpyruvic acid	Organic acids and derivatives	217000	455000	1010000	1800000	1980000	1990000	1.47072	3.43044	1.77839	up	--	--
pmf0232	Tiliroside	Flavonoid	180000	833000	108000	9	9	99500	1.25516	0.0887761	-3.49368	down	C17140	--
pmf0264	Apigeninidin chloride	Anthocyanins	1420000	7710000	6920000	10400000	8530000	13600000	1.10923	2.02679	1.0192	up	--	--
pmf0275	Herbacetin	Flavonoid	9	267000	141000	9	9	9	1.21513	6.6175e-05	-13.8834	down	--	--
pmf0301	Engeletin	Flavonoid	1170000	4380000	383000	508000	368000	499000	1.0072	0.231755	-2.10933	down	--	--
pmf0315	Sclareol	Terpene	115000	15100	58500	17500	9550	25200	1.06474	0.277041	-1.85183	down	C09183	ko00904,ko01110
pmf0338	Roseoside	Terpene	8580000	10700000	11600000	5330000	5140000	3450000	1.61362	0.450777	-1.14951	down	--	--
pmf0360	Astilbin	Flavonoid	11000000	5230000	2510000	2730000	1670000	1920000	1.25293	0.337247	-1.56812	down	C17449	--
pmf0433	Swertiamarin	Terpene	1870000	406000	516000	439000	224000	217000	1.18293	0.315186	-1.66572	down	C09800	--
pmf0458	6-Gingerol	Polyphenol	508000	170000	284000	9	9	207000	1.20784	0.215195	-2.21628	down	C10462	ko00945,ko01110
pmf0461	Febrifugine	Alkaloids	122000	68100	139000	261000	228000	398000	1.53343	2.69523	1.43041	up	C10677	--
pmf0532	Phillyroside	Phenylpropanoids	9	9	42400	48500	31900	50000	1.23088	3.07417	1.6202	up	C17048	--
pmf0549	Diosmin	Flavonoid	20400000	48400000	13200000	10600000	11700000	13200000	1.15046	0.432927	-1.2078	down	C10039	--
pmf0551	Tectochrysin	Flavonoid	72900	50100	39400	25600	13500	22800	1.50901	0.381158	-1.39154	down	C11621	--
pmf0572	Paeonol	Phenylpropanoids	77900	106000	87000	9	55500	9	1.28876	0.204939	-2.28673	down	C10712	--
pmf0594	D-(+)-Phenylalanine	Amino acid and derivatives	4460000	3610000	3640000	1140000	1060000	620000	1.67782	0.24082	-2.05397	down	C02265	ko00360,ko04742
